# Supplementary material for: Hypothetical membrane mechanisms in essential tremor
Source: PubMed Central journal article supplement (PMC2613385; doi:10.1186/1479-5876-6-68), 2008-11-06

# Voltage dependences of H-current

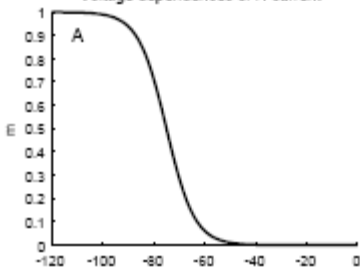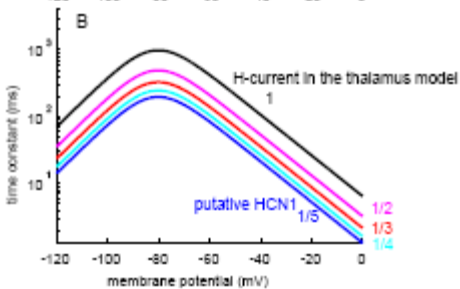

Supplement: 1479-5876-6-68-S3.pdf [file 1479-5876-6-68-S3.pdf]
